# Supplementary material for: Estratégias de marketing para turismo internacional
Source: Royal Society of Chemistry journal article supplement (doi:10.1039/c5dt00727e), 1995-01-01
Supplement: c5dt00727e1.pdf [file c5dt00727e1.pdf]

## Electronic supplementary information (ESI)

### Synthesis, structure, spectral and electrochemical properties of chromium(III) *tris*-(8-hydroxyquinolate)

Ana R. Freitas, Mónica Silva, M. Luísa Ramos, Licínia L. G. Justino, Sofia M. Fonseca, Madalina M. Barsan, Christopher M. A. Brett, M. Ramos Silva, Hugh D. Burrows\*

#### Assignment of bands in FTIR spectra

**Table S1.** FT-IR spectral data obtained using ATR for Crq<sub>3</sub> solid

| Band/cm <sup>-1</sup> | Tentative assignment <sup>a</sup>  |
|-----------------------|------------------------------------|
| 525                   | In-plane ring deformation          |
| 572                   | In-plane ring deformation          |
| 635                   | Out-of-plane ring deformation      |
| 743                   | Out-of-plane C-H bend              |
| 781                   | Out-of-plane C-H bend              |
| 822                   | Out-of-plane C-H bend              |
| 873                   | In-plane C-H bend                  |
| 1053                  | In-plane ring deformation          |
| 1107                  | In-plane C-H bend, C-O stretch     |
| 1166                  | In-plane C-H bend                  |
| 1216                  | Ring stretching; In-plane C-H bend |
| 1274                  | In plane C-H bend                  |
| 1316                  | Ring stretching                    |
| 1371                  | Ring stretching                    |
| 1459 <sup>b</sup>     | C-O stretch                        |
| 1492                  | Ring stretching                    |
| 1571                  | C=C stretch                        |
| 1595                  | C=N stretch                        |
| 2866 <sup>b</sup>     | C-H stretch                        |
| 2960 <sup>b</sup>     |                                    |
| 2964 <sup>b</sup>     |                                    |
| 3053                  |                                    |
| 3325                  | O-H stretch                        |

- a. Using assignments from references 1 and 2.
- b. Bands attributed to methanol from spectral data in reference 3.

### Use of Crq<sub>3</sub> as an NMR Relaxation Agent

The Cr(III) metal complex can act through pseudocontact interactions as a good relaxation agent of non-complexed molecules in solution, as shown in Figures S1 and S2. Here the <sup>1</sup>H NMR signals of unbound 8-Hq molecules (outer-sphere) are observed to be increasingly broadened with the addition of the Crq<sub>3</sub> complex with no significant change in the chemical shifts.

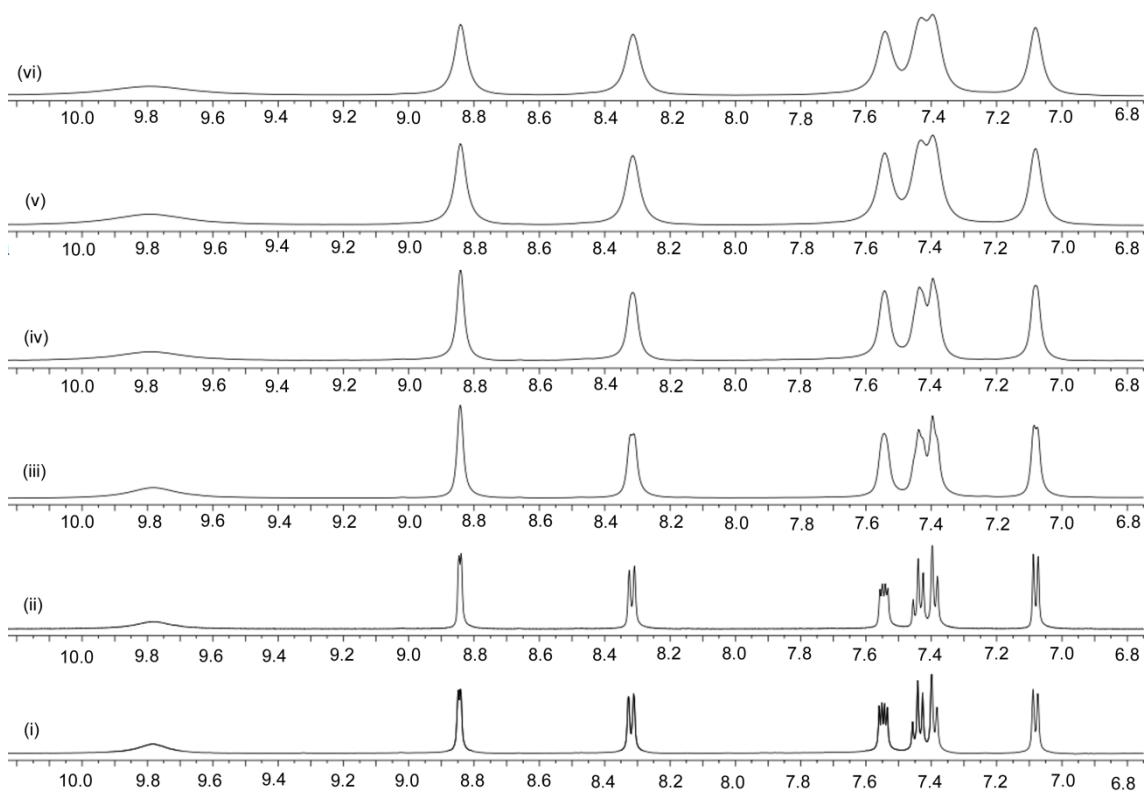

**Fig. S1.** Expansions from 6 to 11 ppm (8-Hq signals) of <sup>1</sup>H NMR spectra (499.824 MHz) of DMSO-*d*<sub>6</sub> solutions of (i) 8-Hq 10 mmol dm<sup>-3</sup>, (ii) Crq<sub>3</sub>:8-Hq 2:10 mmol dm<sup>-3</sup>, (iii) Crq<sub>3</sub>:8-Hq 4:10 mmol dm<sup>-3</sup>, (iv) Crq<sub>3</sub>:8-Hq 6:10 mmol dm<sup>-3</sup>, (v) Crq<sub>3</sub>:8-Hq 8:10 mmol dm<sup>-3</sup>, and (vi) Crq<sub>3</sub>:8-Hq 10:10 mmol dm<sup>-3</sup>, 298 K.

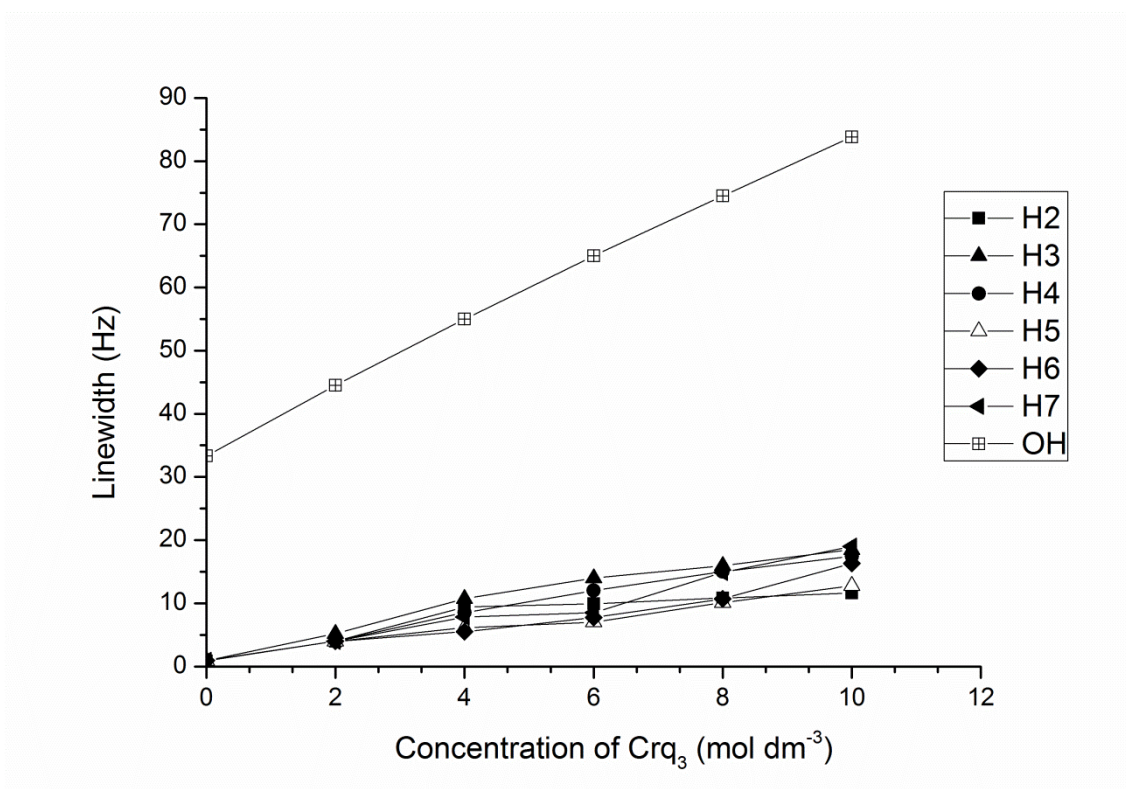

Fi

g. S2. Line width (Hz) of the <sup>1</sup>H NMR signals of 8-Hq 10 mmol dm<sup>-3</sup>, in DMSO-*d*<sub>6</sub> solution, as a function of the concentration of Crq<sub>3</sub> added to the solution.

### Photoluminescence spectrum

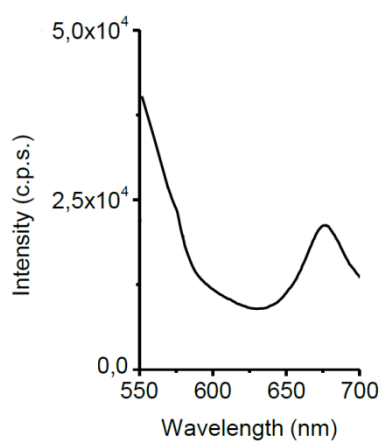

Fig. S3. Luminescence spectrum of Crq<sub>3</sub> in DMSO solution at room temperature ( $\lambda_{\text{excitation}}$  430 nm). The apparent emission below 550 nm is due to a Raman band.

## References

1. R. Marchon, L. Bokobza, G. Cote, *Spectrochim. Acta A* 1986, **42A**, 537-542.
2. C. C. Wagner, A. C. González-Baró, E. J. Baran, *Spectrochim. Acta Part A*, 2011, **78**, 1762-1765.
3. E. K. Plyler *J. Res. Natl. Bureau Standards* 1952, **48**, 281- 286
